# Supplementary material
Source: Springer Nature journal article supplement (https://www.springermedizin.de/resource/supplementary/13012_2012_571_MOESM5_ESM.pdf/9630418)
Supplement: MOESM5 [file 9630418]

Development and user-testing  
of presentations A, B and C

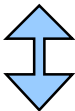

Trial of A

Trial of B

Trial of C

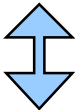

Test A in a real  
guideline

Test C in a real  
guideline
